# Supplementary material
Source: PubMed Central journal article supplement (PMC3555434)
Supplement: NIHMS311275-supplement-supplement_1.pdf [file NIHMS311275-supplement-supplement_1.pdf]

Supplemental Table 1.*Brain Regions Associated with Activation to Attentional Targets (Threshold  $p < 0.001$ )*

| Region                             | BA   | Hemisphere | Maximum $t$ | MNI coordinates |     |    | Cluster size |
|------------------------------------|------|------------|-------------|-----------------|-----|----|--------------|
|                                    |      |            |             | x               | y   | z  |              |
| Control ><br>OD/BPD                |      |            |             |                 |     |    |              |
| Middle frontal gyrus               | 6    | L          | 4.54        | -28             | -7  | 63 | 7            |
| Intraparietal sulcus/<br>Precuneus | 7/40 | L          | 4.80        | -28             | -63 | 42 | 13           |
|                                    | 7    | L          | 4.36        | -28             | -68 | 44 | 6            |
|                                    | 7/40 | R          | 4.26        | 35              | -77 | 42 | 9            |
| Superior parietal lobe             | 7    | L          | 4.76        | -18             | -81 | 53 | 18           |

## Supplemental Table 2.

*Brain Regions Showing Significant Group Differences (Threshold  $p < 0.001$ ) in Activation to*

*Drug vs. Neutral Targets*

| Region                | BA | Hemisphere | Maximum $t$ | MNI coordinates |     |     | Cluster size |
|-----------------------|----|------------|-------------|-----------------|-----|-----|--------------|
|                       |    |            |             | x               | y   | z   |              |
| Control ><br>OD/BPD   |    |            |             |                 |     |     |              |
| Fusiform              | 37 | R          | 4.32        | 21              | -60 | -14 | 17           |
| OD/BPD ><br>Control   |    |            |             |                 |     |     |              |
| Middle temporal gyrus | 39 | R          | 4.09        | 42              | -60 | 21  | 7            |
|                       | 39 | L          | 5.16        | -39             | -67 | 18  | 21           |

Supplemental Table 3.

*Reaction Time (msec) and Image Ratings (1 – 9) of OD/BPD and Control Participants to Task Stimuli*

|                             | Control (n = 12) | OD/BPD (n = 12) |
|-----------------------------|------------------|-----------------|
| Mean reaction times (SD)    |                  |                 |
| Negative                    | 634.8 (261.7)    | 666.2 (222.3)   |
| Neutral                     | 574.2 (197.7)    | 637.3 (211.0)   |
| Drug                        | 601.1 (215.8)    | 634.9 (215.8)   |
| Target                      | 567.3 (110.3)    | 555.6 (114.5)   |
|                             |                  |                 |
|                             | Control (n = 10) | OD/BPD (n = 9)  |
| Negative Image Ratings (SD) |                  |                 |
| Valence                     | 3.20 (1.21)      | 3.20 (1.19)     |
| Arousal                     | 4.67 (2.19)      | 4.46 (2.27)     |
| Neutral Image Ratings (SD)  |                  |                 |
| Valence                     | 5.23 (0.46)      | 4.88 (0.27)     |
| Arousal                     | 2.31 (1.54)      | 2.35 (1.66)     |
